# Supplementary material
Source: publisher figshare collection journal article supplement (https://diabetesjournals.figshare.com/ndownloader/files/25030019)
Supplement: Supplementary file 1 [file 25030019]

## **Supplemental files for**

### **Association of maternal folate and vitamin B<sub>12</sub> in early pregnancy with gestational diabetes mellitus: a prospective cohort study**

Xiaotian Chen<sup>1</sup>, Yi Zhang<sup>1</sup>, Hongyan Chen<sup>1</sup>, Yuan Jiang<sup>1</sup>, Yin Wang<sup>1</sup>, Dingmei Wang<sup>1</sup>, Mengru Li<sup>1</sup>, Yalan Dou<sup>1</sup>, Xupeng Sun<sup>1</sup>, Guoying Huang<sup>1,2\*</sup>, Weili Yan<sup>1,2\*</sup>

**Running title:** Folate, vitamin B<sub>12</sub> and gestational diabetes

#### **Affiliations**

1. Department of Clinical Epidemiology & Clinical Trial Unit, Children's Hospital of Fudan University, National Children's Medical Center, Shanghai, China
2. Shanghai Key Laboratory of Birth Defect, Shanghai, China

#### **Corresponding authors:**

**Weili Yan, PhD, [yanwl@fudan.edu.cn](mailto:yanwl@fudan.edu.cn)**

Department of Clinical Epidemiology & Clinical Trial Unit, Children's Hospital of Fudan University, National Children's Medical Center, Shanghai, China & Shanghai Key Laboratory of Birth Defect, Shanghai, China;

Address: 399 Wan Yuan Road, Shanghai 201102, People's Republic of China

Tel: 86-21-64931215;

Fax: 86-21-64931215;

**Guoying Huang, MD, [gyhuang@shmu.edu.cn](mailto:gyhuang@shmu.edu.cn)**

Pediatric Heart Center, Children's Hospital of Fudan University, National Children's Medical Center, Shanghai, China & Shanghai Key Laboratory of Birth Defect, Shanghai, China;

Address: 399 Wan Yuan Road, Shanghai 201102, People's Republic of China

Tel: 86-21-64931928

Fax: 86-21-64931002

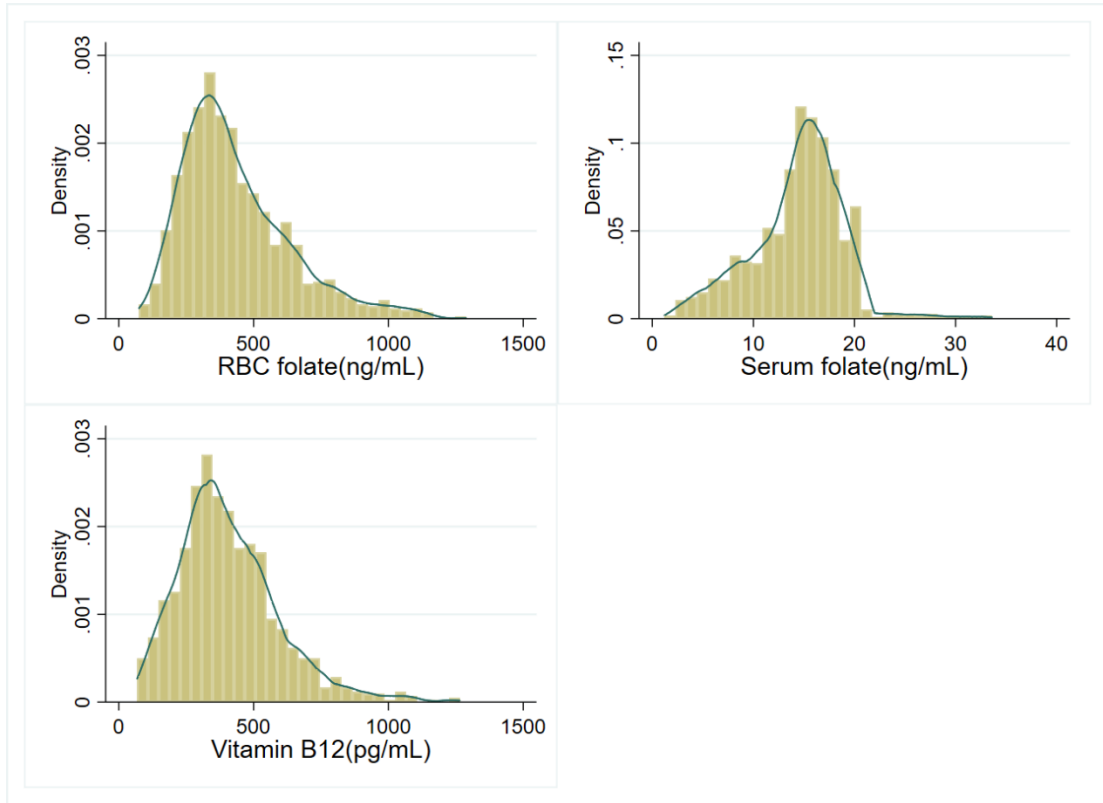

Supplemental Figure S1. The distribution RBC folate (ng/mL), serum folate(ng/mL) and serum vitamin B<sub>12</sub> (pg/mL) concentration.

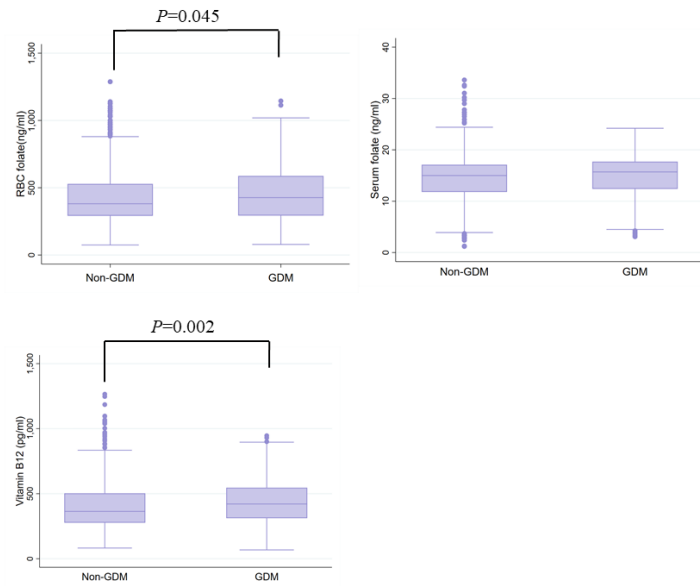

Supplemental Figure S2. Comparison of RBC folate, serum folate and vitamin B<sub>12</sub> between GDM and non-GDM. RBC folate and vitamin B<sub>12</sub> levels of GDM were significantly higher than that of non-GDM [426.44 (293.15, 587.61) vs 380.95 (291.44, 528.53) (ng/mL),  $P=0.045$ ; 421.00 (312.00, 546.00) vs 364.00 (277.00, 503.00) (pg/mL),  $P=0.002$ ].

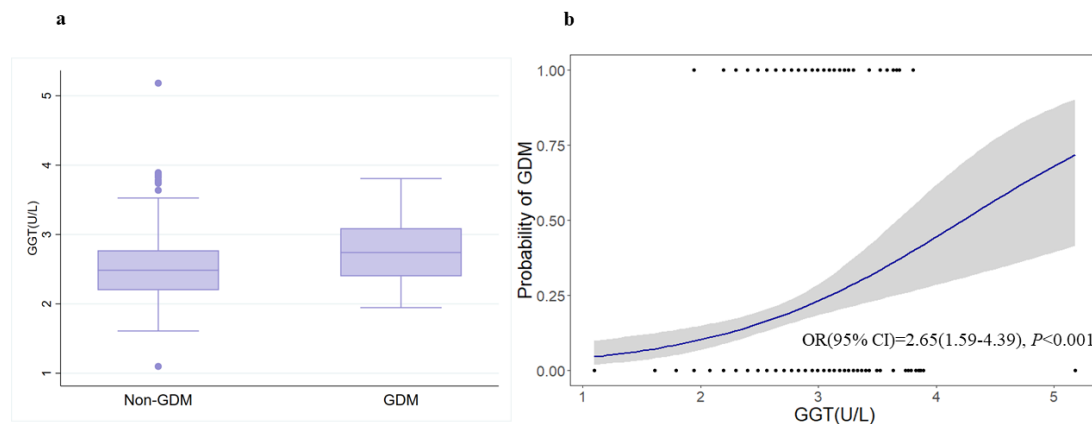

Supplemental Figure S3. The comparison of GGT at early pregnancy between GDM and non-GDM is based on a subgroup of study subjects (n=458). To explore the potential mechanisms of how higher vitamin B<sub>12</sub> associated with an increased risk of GDM, the  $\gamma$ -glutamyl transferase level (GGT), one of impaired liver function markers measured in routine antenatal care, was analyzed with GDM risk. Figure a showed the GGT level in GDM was significantly higher than non-GDM [2.7 (2.3, 3.1) vs 2.4 (2.1, 2.7),  $P < 0.001$ ]; Figure b depicted the probability of GDM fitted by logistical regression, high GGT concentration was significantly associated with GDM risk, OR(95% CI)=2.65(1.59-4.39),  $P < 0.001$ .

**Supplemental Table S1. Association of folate/vitamin B<sub>12</sub> in early pregnancy with GDM risk**

| Variables                                             | Group           | GDM/Total (%) | Model 1 <sup>†</sup> |           |          | Model 2 <sup>‡</sup> |           |          |
|-------------------------------------------------------|-----------------|---------------|----------------------|-----------|----------|----------------------|-----------|----------|
|                                                       |                 |               | OR                   | 95% CI    | <i>P</i> | OR                   | 95% CI    | <i>P</i> |
| RBC folate/<br>vitamin B <sub>12</sub>                |                 |               | 0.97                 | 0.83-1.15 | 0.79     | 0.923                | 0.77-1.09 | 0.36     |
|                                                       | Q1(<0.69)       | 47/257(18.2)  |                      | Ref       |          |                      | Ref       |          |
|                                                       | Q2(0.69-1.55)   | 88/538(16.3)  | 0.87                 | 0.59-1.29 | 0.49     | 0.83                 | 0.55-1.24 | 0.36     |
|                                                       | Q3(≥1.55)       | 45/263(17.1)  | 0.92                 | 0.58-1.44 | 0.72     | 0.80                 | 0.50-1.28 | 0.37     |
|                                                       | Trend test      |               |                      |           | 0.72     |                      |           | 0.37     |
| Serum folate/<br>vitamin B <sub>12</sub> <sup>*</sup> |                 |               | 0.99                 | 0.98-0.99 | 0.027    | 0.98                 | 0.97-0.99 | 0.009    |
|                                                       | Q1(<28.98)      | 62/310(20.0)  |                      | Ref       |          |                      | Ref       |          |
|                                                       | Q2(28.98-48.23) | 73/444(16.4)  | 0.78                 | 0.54-1.14 | 0.21     | 0.76                 | 0.52-1.13 | 0.18     |
|                                                       | Q3(≥48.23)      | 45/304(14.8)  | 0.69                 | 0.45-1.05 | 0.09     | 0.63                 | 0.41-0.98 | 0.042    |
|                                                       | Trend test      |               |                      |           | 0.08     |                      |           | 0.041    |

\* the ratio of serum folate to vitamin B<sub>12</sub> concentrations was determined by dividing folate concentrations (ng/mL) by vitamin B<sub>12</sub> concentrations (pg/mL) and multiplying by 1000; † univariate model; ‡ adjusted for age, preconceptional-BMI, family history of diabetes, smoking exposure and drinking status;

**Table S2. Association of maternal serum folate levels at mid-gestation with GDM risk (N=458)**

| Variable                | Group        | GDM (%)      | Model 1 <sup>†</sup> |           |          | Model 2 <sup>‡</sup> |           |          |
|-------------------------|--------------|--------------|----------------------|-----------|----------|----------------------|-----------|----------|
|                         |              |              | OR                   | 95% CI    | <i>P</i> | OR                   | 95% CI    | <i>P</i> |
| Serum folate<br>(ng/ml) |              |              | 1.08                 | 1.03-1.13 | 0.001    | 1.08                 | 1.03-1.14 | 0.002    |
|                         | Q1(<5.1)     | 16/138(11.5) |                      | Ref       |          |                      | Ref       |          |
|                         | Q2(5.1-10.7) | 23/140(16.4) | 1.49                 | 0.75-2.39 | 0.24     | 1.48                 | 0.72-3.06 | 0.28     |
|                         | Q3(≥10.7)    | 34/136(25.0) | 2.81                 | 1.32-4.87 | 0.005    | 2.54                 | 1.28-5.03 | 0.007    |
| Serum folate<br>change* |              |              | 0.94                 | 0.90-0.98 | 0.017    | 0.95                 | 0.90-0.99 | 0.019    |

This analysis was conducted based on a subgroup of our study subjects (n=458);

\* The levels at early pregnancy minus the levels at mid-gestation;

† Univariate model;

‡ Adjusted for age, preconceptional-BMI, family history of diabetes, smoking exposure and drinking status.
